# Supplementary material for: Probing evaporation induced assembly across a drying colloidal droplet using in situ small-angle X-ray scattering at the synchrotron source
Source: Royal Society of Chemistry journal article supplement (doi:10.1039/c3sm52039k), 2013-12-12
Supplement: c3sm52039k.pdf [file c3sm52039k.pdf]

*Supplementary Materials:*

**Probing Evaporation induced Assembly across a Drying Colloidal Droplet  
using *in situ* Small-Angle X-ray Scattering at Synchrotron Source**

D. Sen<sup>1</sup>, J. Bahadur<sup>1</sup>, S. Mazumder<sup>1</sup>, G. Santoro<sup>2</sup>, S. Yu<sup>2</sup> and S. V. Roth<sup>2</sup>

<sup>1</sup>*Solid State Physics Division, Bhabha Atomic Research Centre, Mumbai-400085, India*

<sup>2</sup>*Deutsches Elektronen-Synchrotron (DESY), Notkestr. 85, D-22607, Hamburg, Germany*

**1. Calculation of Porod invariant using the effective thickness traversed by x-ray beam while passing through a colloidal droplet**

**i) Spherical droplet with uniform volume fraction  $\phi$  of colloids:**

$$(AB)^2 = R^2 - x^2$$

Effective thickness =  $2AB$  So, Porod invariant  $(Q) \propto \phi \cdot (1 - \phi) 2AB = \phi \cdot (1 - \phi) (R^2 - x^2)^{0.5}$

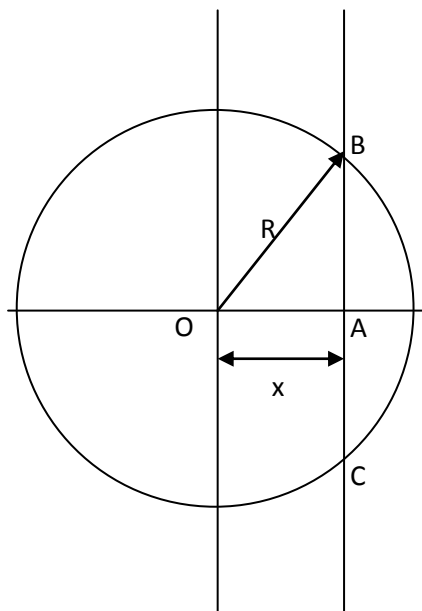

**Fig. Supp. 1.** Calculation of Porod invariant across a droplet with uniform volume fraction of colloids.

**ii) Hollow Spherical grain:**

**iii) Core and shell at different volume fraction ( $\phi_1$  and  $\phi_2$ , respectively) :**

$$\text{Porod invariant} \propto [2(MP-MN)\phi_2(1-\phi_2)+(2MN)\phi_1(1-\phi_1)]$$

For  $x < R_i$ ,

$$\text{Porod invariant} \propto 2\phi_1(1-\phi_1)(R_i^2-x^2)^{0.5} + 2\phi_2(1-\phi_2)(R_o^2-R_i^2)/[(R_o^2-x^2)^{0.5}+(R_i^2-x^2)^{0.5}]$$

For  $R_i < x < R_o$ ,

$$\text{Porod invariant} \propto 2\phi_2(1-\phi_2)(R_o^2-x^2)^{0.5}$$

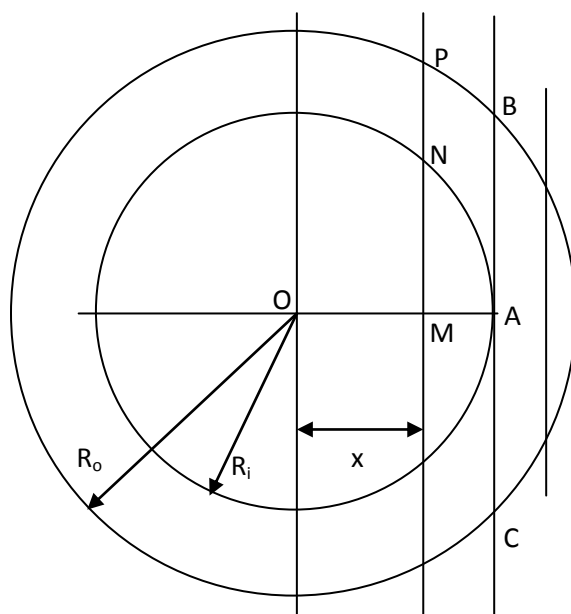

**Fig. Supp. 3. Calculation of Porod invariant for the situation where core and shell are at different volume fractions of colloids.**

**Form factor and structure factor of colloids for standard experiments performed using colloids in capillary tube:**

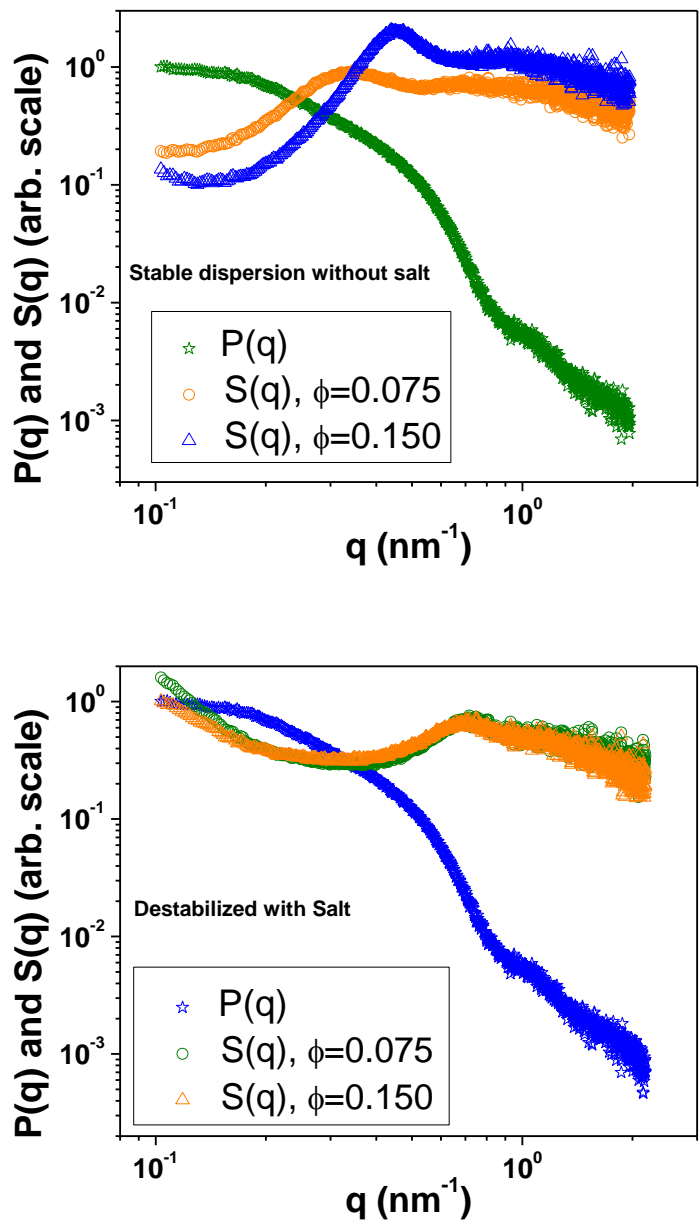

**Fig. supp. 4.** (Top) Form factor and structure factor of the stable dispersion. (Bottom) Form factor and structure factor of the NaCl destabilized LUDOX dispersion.

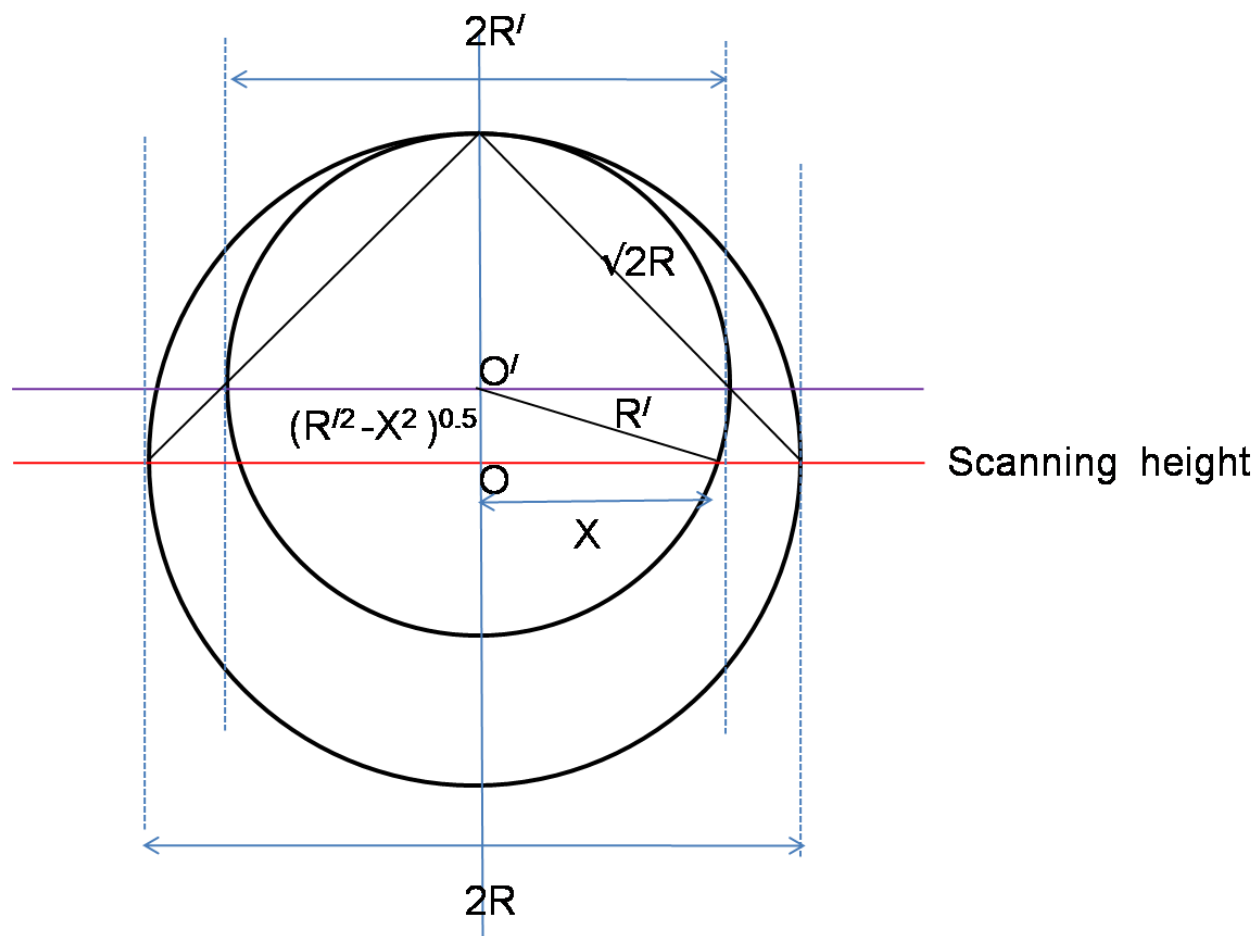

**Fig. supp. 5.** Schematic diagram illustrating the relation between the droplet thickness measured at any time and its actual radius at that time.

At time  $t=0$ , the horizontal scanning measures the diameter ( $2R$ ) of the droplet. At other time a chord ( $2X$ ) other than the diameter ( $2R'$ ) is measured. To correlate the measured length  $2X$  with diameter at that time one can use the following formula. From the above figure,  $R - R' = \sqrt{R'^2 - X^2}$

and thus

$R' = \frac{R^2 + X^2}{2R}$ . So, one can estimate the diameter at later time from the measure value of  $X$ .

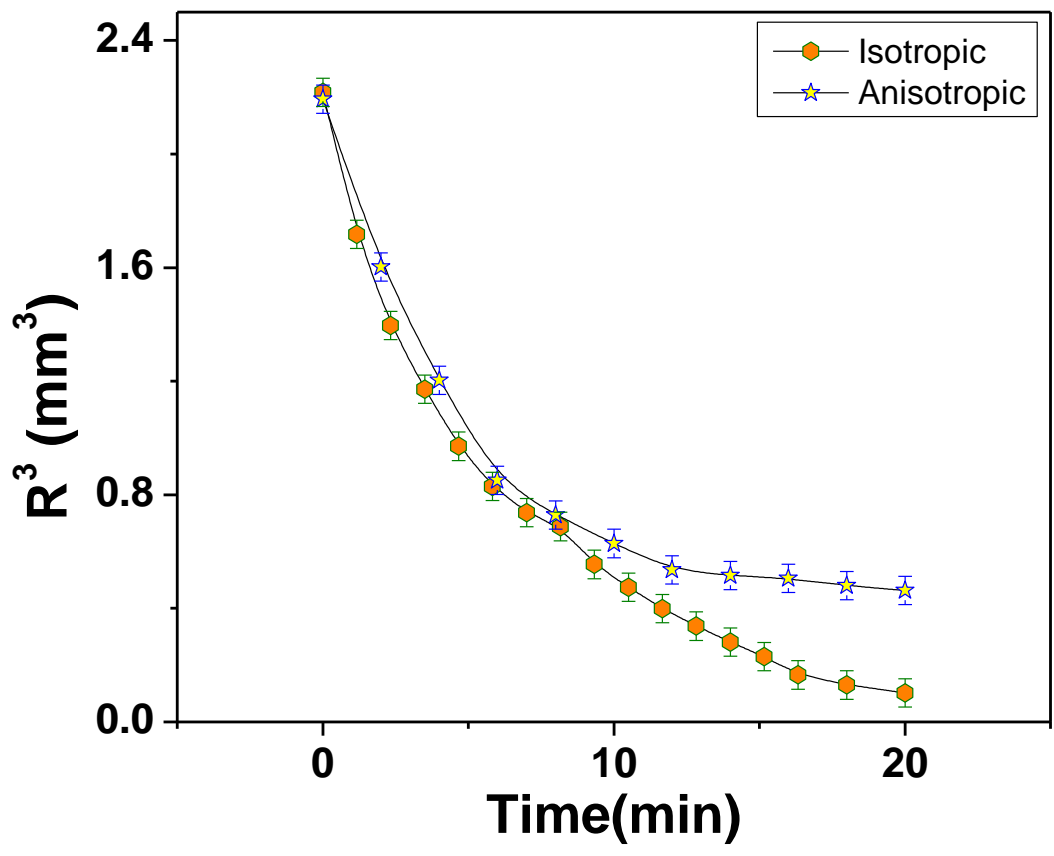

**Fig. supp. 6.** *Variation of external droplet volume with time in isotropic and anisotropic cases.*

### **Calculation of initial colloidal concentration required to completely coat the surface of a droplet**

From the conservation of particle number in the droplet, one gets

$$\phi_{shell}(t) = \frac{\phi_0 R_0^3 - \phi_{core}(t) R_{in}^3(t)}{[R_{out}^3(t) - R_{in}^3(t)]}$$

To estimate the lowest concentration required for the shell formation at  $t=0$ , it is assumed that all the nanoparticles take part in shell formation to completely coat the droplet surface by forming monolayer leaving no particle in the core. , In this case,  $R_{in}=R_0-2r_p$ .  $\phi_{shell}=\phi_c$  (critical concentration) and  $\phi_{core}=0$ . The expression for  $\phi_0$  can be as estimated from the above equation as follows

$$\phi_0 = \frac{\phi_c (R_0^3 - (R_0 - 2r_p)^3)}{R_0^3}$$

If  $R_0=1.5$  mm,  $r_p=5$  nm,  $\phi_c$  is taken to be 0.74, then the value of  $\phi_0$  in this case becomes  $1.5 \times 10^{-5}$ . We would like to point out that such a case can happen only with extremely fast drying without shrinkage of droplet, where all particles immediately can form a shell leaving no particle at core.
